# Supplementary material for: Self-assembly directed synthesis of Au nanorices induced by polyaniline and their enhanced peroxidase-like catalytic properties
Source: Royal Society of Chemistry journal article supplement (doi:10.1039/c7tc01761h), 2017-01-01
Supplement: c7tc01761h1.pdf [file c7tc01761h1.pdf]

**Electronic Supplementary Information**

**Self-assembly directed synthesis of Au nanorices induced by polyaniline and their  
enhanced peroxidase-like catalytic properties**

Wei Song,<sup>\*a</sup> Maoqiang Chi,<sup>b</sup> Mu Gao,<sup>b</sup> Bing Zhao,<sup>a</sup> Ce Wang,<sup>b</sup> Xiaofeng Lu,<sup>\*b</sup>

*<sup>a</sup>State Key Laboratory of Supramolecular Structure and Materials, Jilin University,  
Changchun 130012, P. R. China*

*<sup>b</sup>Alan G. MacDiarmid Institute, College of Chemistry, Jilin University, Changchun,  
130012, P. R. China.*

*\*Corresponding author:*

*Fax & Tel.: +86-431-85168292; E-mail: [weisong@jlu.edu.cn](mailto:weisong@jlu.edu.cn); [xflu@jlu.edu.cn](mailto:xflu@jlu.edu.cn);*

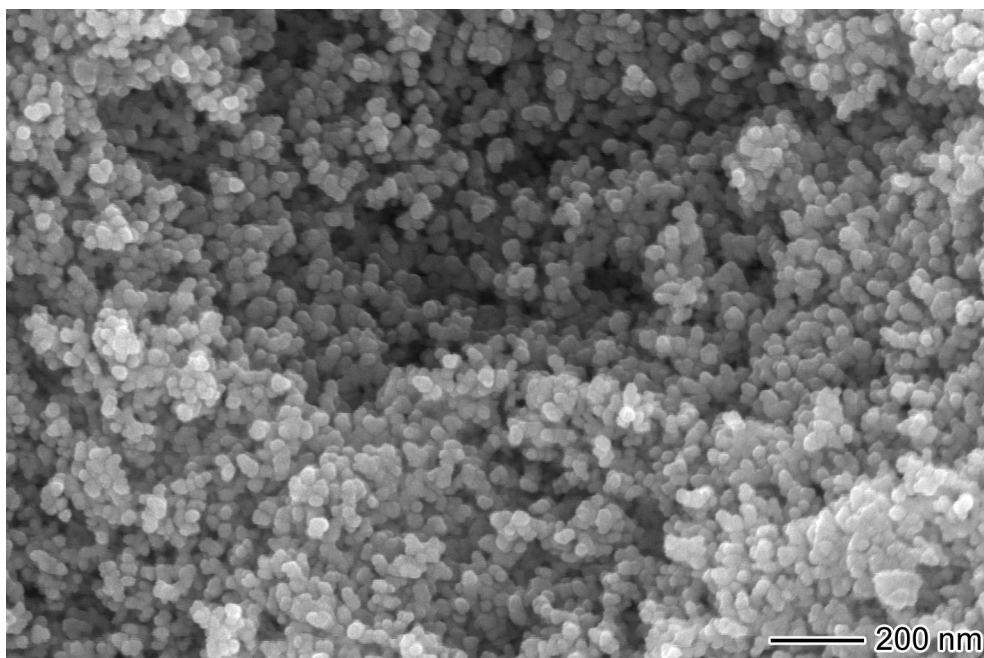

**Fig. S1** SEM images of the Au nanospheres that synthesized via a  $\text{NaBH}_4$  as a reducing agent.

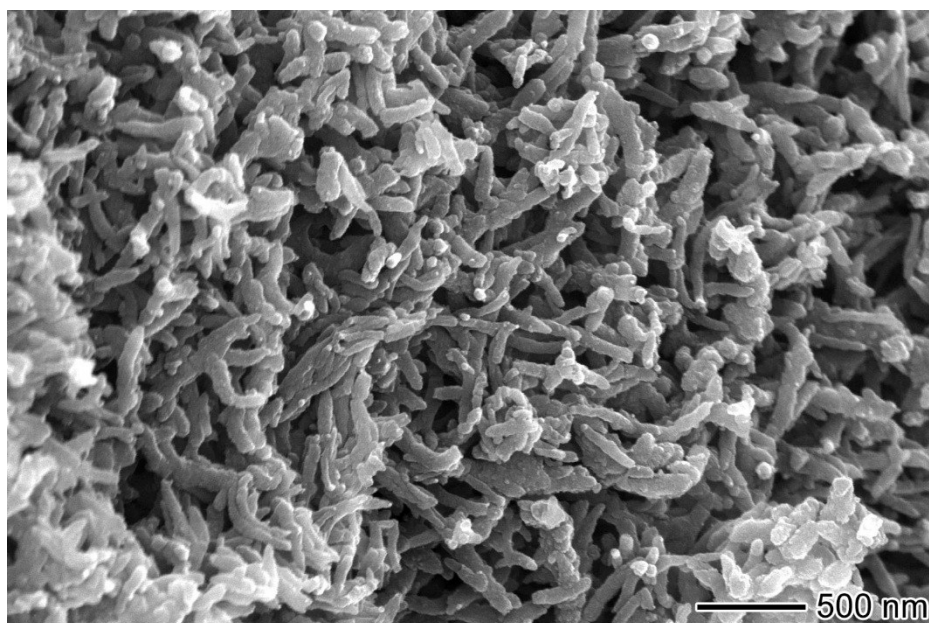

**Fig. S2** SEM image of the individual PANI nanofibers that synthesized via a rapid mixing polymerization approach.

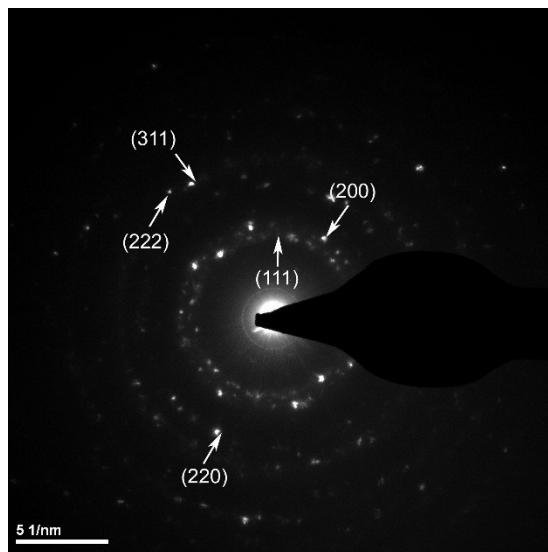

| $h\ k\ l$ | $d_{hkl}$ (nm) |        |
|-----------|----------------|--------|
|           | experiment     | theory |
| (111)     | 0.2300         | 0.2355 |
| (200)     | 0.1987         | 0.2039 |
| (220)     | 0.1424         | 0.1442 |
| (311)     | 0.1206         | 0.1230 |
| (222)     | 0.1161         | 0.1177 |

**Fig. S3** ED pattern of the prepared Au/PANI nanorice and the corresponding data for experimental and theoretical  $d_{hkl}$ .

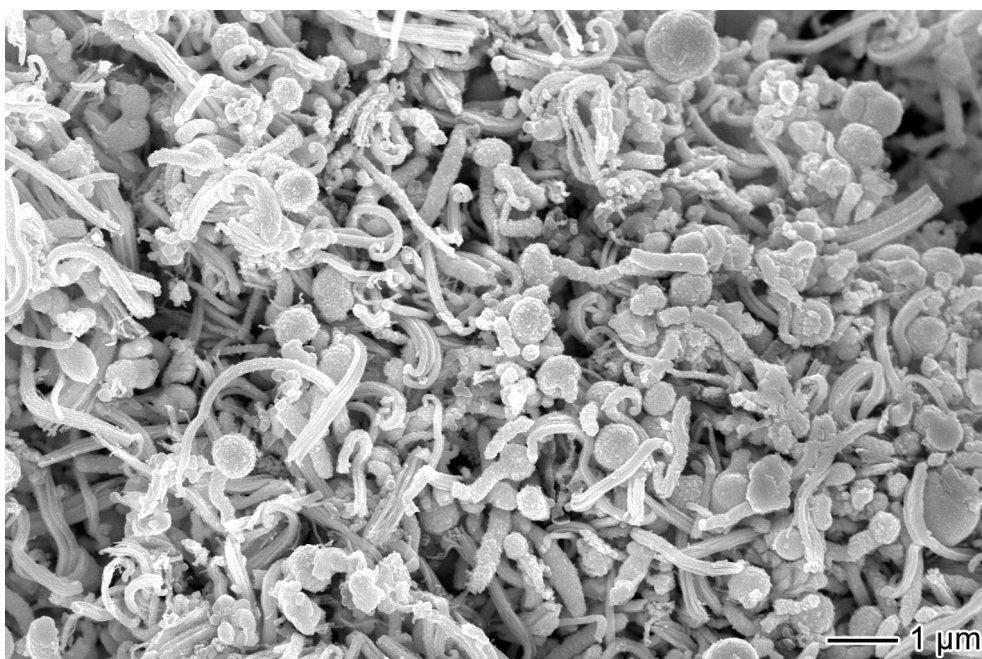

**Fig. S4** SEM image of the prepared Au/PANI nanocomposites synthesized in the absence of APTES.

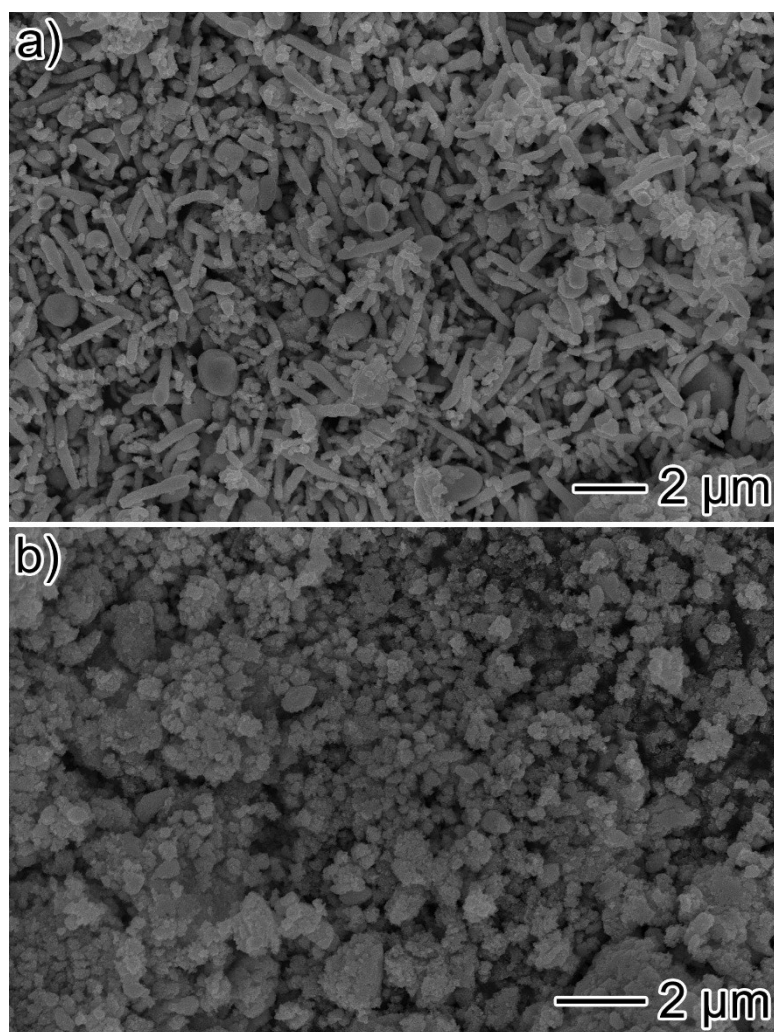

**Fig. S5** SEM images of the prepared Au/PANI nanocomposites synthesized with different contents of APTES. a) 5  $\mu\text{L}$ ; b) 20  $\mu\text{L}$ .

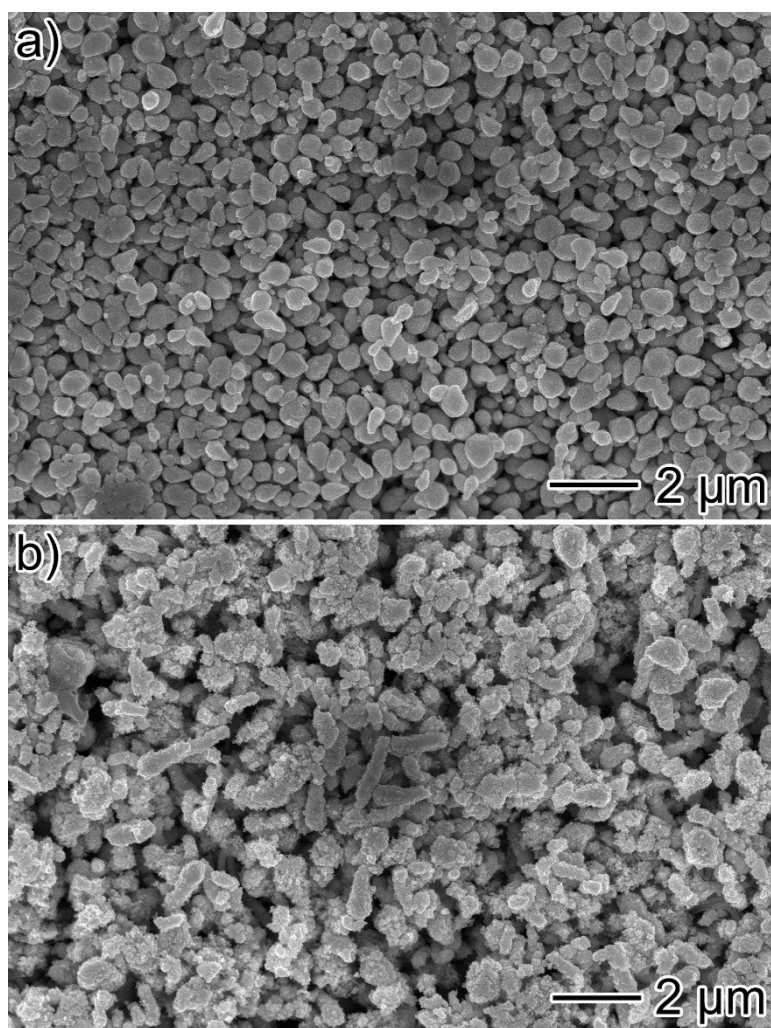

**Fig. S6** SEM images of the prepared Au/PANI nanocomposites synthesized with different contents of  $\text{HAuCl}_4$ . a) 0.25 mL; b) 1.0 mL.

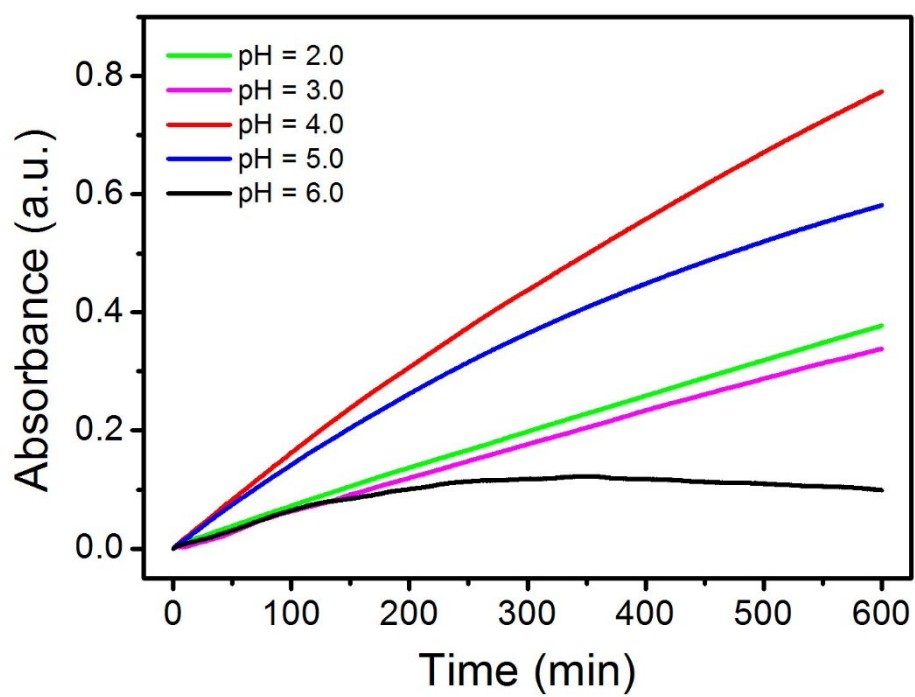

**Fig. S7** Dependence of the peroxidase-like catalytic activity of the prepared Au/PANI nanorice on the pH values in acetate buffer solution.



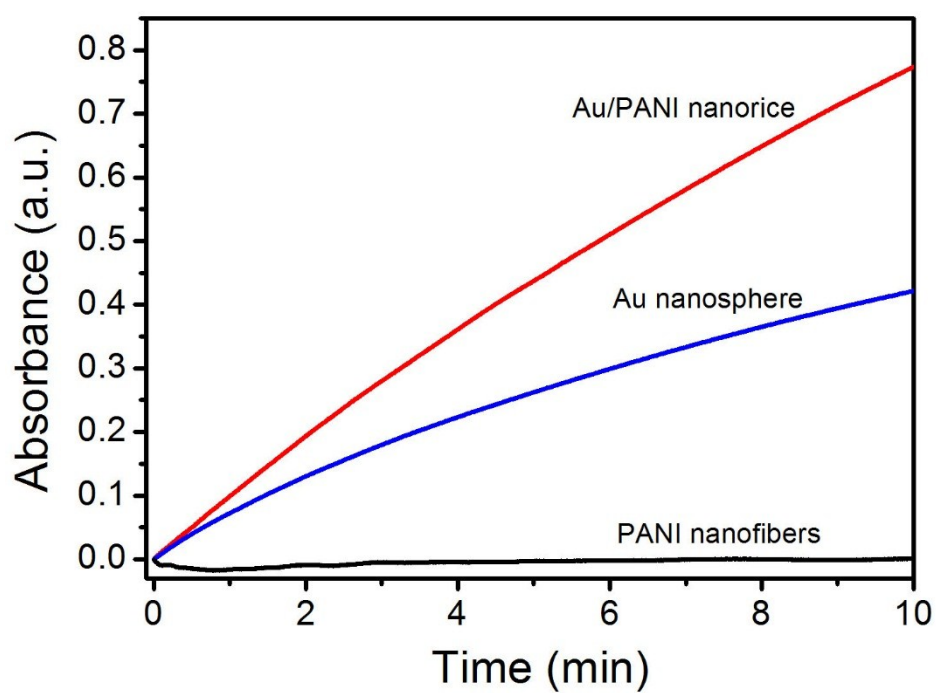

**Fig. S8** Time-dependent absorption changes at 650 nm with the addition of different types of catalysts (Au/PANI nanorice, Au nanospheres, PANI nanofibers).
